# Supplementary material for: Is pretreatment Epstein-Barr virus DNA still associated with 6-year survival outcomes in locoregionally advanced nasopharyngeal carcinoma?
Source: PubMed Central journal article supplement — J Cancer. 2017 Mar 12;8(6):976–82. doi: 10.7150/jca.18124 (PMC5436249; doi:10.7150/jca.18124), 2017-03-12
Supplement: jcav08p0976s1.pdf [file jcav08p0976s1.pdf]

**Supplementary table 1.** Univariate analysis for various clinical endpoints

| Endpoint | Characteristic | OR   | 95% CI    | P-value |
|----------|----------------|------|-----------|---------|
| OS       | Age            | 1.77 | 1.28-2.44 | < 0.001 |
|          | Sex            | 0.77 | 0.52-1.14 | 0.188   |
|          | Histology      | 0.43 | 0.26-0.7  | < 0.001 |
|          | Pre-DNA        | 1.65 | 1.2-2.26  | 0.002   |
|          | T stage        | 0.74 | 0.46-1.2  | 0.22    |
|          | N stage        | 2.23 | 1.64-3.05 | < 0.001 |
|          | Overall stage  | 2.45 | 1.79-3.35 | < 0.001 |
|          | Treatment      | 0.88 | 0.52-1.49 | 0.642   |
| DMFS     | Age            | 1.27 | 0.9-1.78  | 0.174   |
|          | Sex            | 0.8  | 0.53-1.22 | 0.303   |
|          | Histology      | 0.57 | 0.32-1.03 | 0.063   |
|          | Pre-DNA        | 2.06 | 1.47-2.89 | < 0.001 |
|          | T stage        | 0.75 | 0.44-1.26 | 0.272   |
|          | N stage        | 2.67 | 1.9-3.75  | < 0.001 |
|          | Overall stage  | 2.29 | 1.63-3.21 | < 0.001 |
|          | Treatment      | 0.95 | 0.51-1.76 | 0.874   |
| LRFS     | Age            | 1.4  | 0.95-2.07 | 0.093   |
|          | Sex            | 1.37 | 0.9-2.09  | 0.142   |
|          | Histology      | 0.36 | 0.2-0.65  | < 0.001 |
|          | Pre-DNA        | 0.99 | 0.65-1.52 | 0.969   |
|          | T stage        | 0.92 | 0.48-1.77 | 0.81    |
|          | N stage        | 1.27 | 0.85-1.9  | 0.236   |
|          | Overall stage  | 1.4  | 0.94-2.07 | 0.096   |
|          | Treatment      | 1.15 | 0.57-2.32 | 0.701   |

|     |               |      |           |         |
|-----|---------------|------|-----------|---------|
| PFS | Age           | 1.47 | 1.14-1.9  | 0.003   |
|     | Sex           | 0.96 | 0.71-1.29 | 0.787   |
|     | Histology     | 0.48 | 0.31-0.74 | < 0.001 |
|     | Pre-DNA       | 1.47 | 1.13-1.91 | 0.004   |
|     | T stage       | 0.73 | 0.5-1.09  | 0.125   |
|     | N stage       | 1.86 | 1.44-2.4  | < 0.001 |
|     | Overall stage | 1.84 | 1.43-2.38 | < 0.001 |
|     | Treatment     | 0.88 | 0.57-1.36 | 0.572   |

---

Abbreviations: CI, confident interval; OR, odds ratio; OS, overall survival; DMFS, distant metastasis free survival; LRFS, locoregional relapse free survival; PFS, progression-free survival.
